# Supplementary material
Source: PubMed Central journal article supplement (PMC9878056)

Figure E2:

A. mRNA-1273 Vaccine Skin Testing Sensitivity and Specificity (Severe Reactions Only)

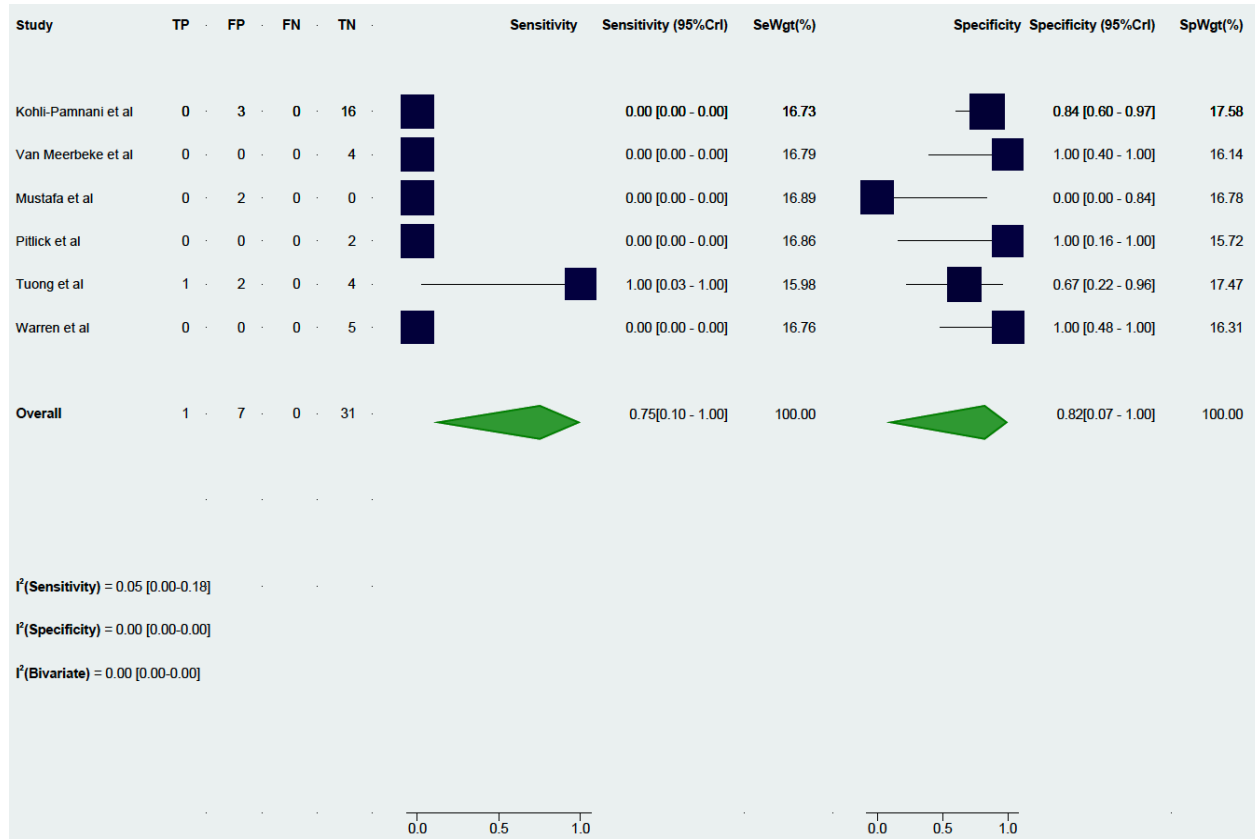

B. BNT162b2 Vaccine Skin Testing Sensitivity and Specificity (Severe Reactions Only)

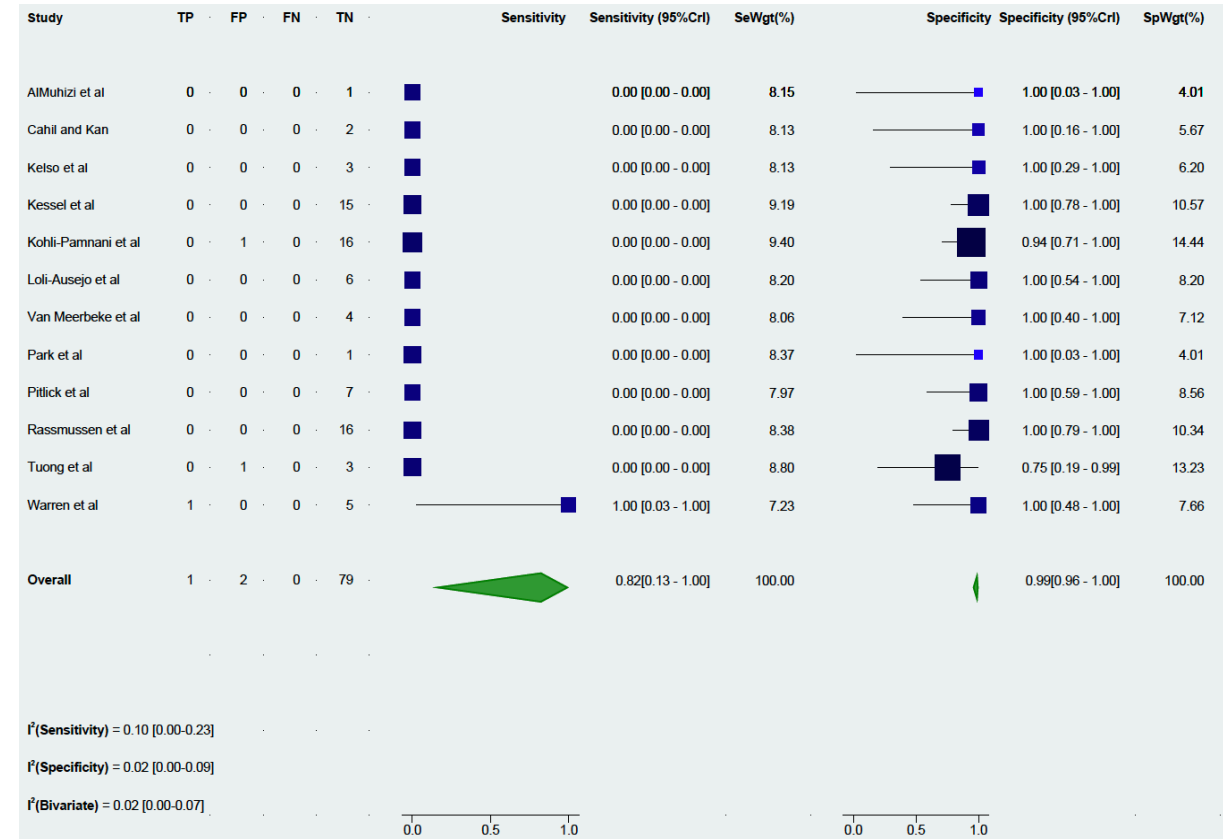

Supplement: ALL-78-71-s006.pdf [file ALL-78-71-s006.pdf]
